# Supplementary material for: Co-localization and confinement of ecto-nucleotidases modulate extracellular adenosine nucleotide distributions
Source: PubMed Central journal article supplement (PMC7316229; doi:10.1371/journal.pcbi.1007903), 2020-06-25
Supplement: pcbi.1007903.s003.pdf [file pcbi.1007903.s003.pdf]

## S.2 Text

### Mathematical Notation

$\Phi_{CD39}$  Electric potential on the surface of CD39.

$\Phi_{CD73}$  Electric potential on the surface of CD73.

$\Phi_{junction}$  Electric potential on the boundary surface of the junction.

$\Gamma_{CD39}$  Boundary surface of the model at CD39.

$\Gamma_{CD73}$  Boundary surface of the model at CD73.

$\Gamma_j$  Boundary surface of the model at the junction.

$\Gamma_L$  Boundary surface of the model at the left reservoir.

$\Gamma_R$  Boundary surface of the model at the right reservoir.

$d_{CD39,CD73}$  Center-to-center separation distance between CD39 and CD73.

$d_{tether}$  Distance from center of enzyme to nearest point on junction wall.

$k_{eff}$  Ratio of **Ado** production at CD73 to rate of **ATP** association at CD39.

$k_{on,ATP}$  Rate of **ATP** association at CD39.

$k_{on,AMP}$  Rate of **AMP** association at CD73.

$k_{prod,AMP}$  Rate of **AMP** production at CD39.

$k_{prod,Ado}$  Rate of **Ado** production at CD73.

$r_E$  Radius of sphere representing CD39 or CD73 enzyme.

$r_j$  Radius of cylindrical junction in the model.

### Abbreviations

**Ado** adenosine.

**ADP** adenosine diphosphate.

**AMP** adenosine monophosphate.

**ATP** adenosine triphosphate.

**DHFR-TS** dihydrofolate reductase-thymidylate synthase.

**NDA** ecto-nucleotidase.

**ODE** ordinary differential equation.
